# Supplementary material for: Hypoglycemic and Hypolipidemic Effects of Phellinus Linteus Mycelial Extract from Solid-State Culture in A Rat Model of Type 2 Diabetes
Source: PubMed Central journal article supplement (PMC6412584; doi:10.3390/nu11020296), 2019-01-30
Supplement: nutrients-11-00296-s001.pdf [file nutrients-11-00296-s001.pdf]

**Supplemental Table S1.** Composition of HFD (cat # D12451, Opensource Animal Diets).

| Component                             | Composition |       |
|---------------------------------------|-------------|-------|
|                                       | gm%         | kcal% |
| Protein                               | 24          | 20    |
| Carbohydrate                          | 41          | 35    |
| Fat                                   | 24          | 45    |
| Total                                 |             | 100   |
| kcal/gm                               | 4.73        |       |
| Ingredient                            | gm          | kcal  |
| Casein                                | 200         | 800   |
| L-Cystine                             | 3           | 12    |
| Corn starch                           | 72.8        | 291   |
| Maltodextrin                          | 100         | 400   |
| Sucrose                               | 172.8       | 691   |
| Cellulose                             | 50          | 0     |
| Soybean oil                           | 25          | 225   |
| Lard                                  | 177.5       | 1598  |
| Mineral mix S10026                    | 10          | 0     |
| Dicalcium Phosphate                   | 13          | 0     |
| Calcium carbonate                     | 5.5         | 0     |
| Potassium citrate, 1 H <sub>2</sub> O | 16.5        | 0     |
| Vitamin mix V10001                    | 10          | 40    |
| Choline bitartrate                    | 2           | 0     |
| FD&C Yellow dye #5                    |             |       |
| FD&C Red dye #40                      | 0.05        | 0     |
| FD&C Blue dye #1                      |             |       |
| Total                                 | 858.15      | 4057  |

**Supplemental Table S2.** Values of body weight, fasting blood glucose (FBG), triglycerides (TG), and total cholesterol (T-CHO) at 6 wk in animals fed on standard Chow diet and HFD.

| Parameter       | Group        |                           |
|-----------------|--------------|---------------------------|
|                 | Chow diet    | HFD                       |
| Body weight (g) | 448.44±13.41 | 504.83±5.86 <sup>aa</sup> |
| FBG (mmol/L)    | 5.79±0.15    | 7.24±0.09 <sup>aa</sup>   |
| TG (mmol/L)     | 0.70±0.04    | 1.14±0.05 <sup>aa</sup>   |
| T-CHO (mmol/L)  | 1.42±0.07    | 2.43±0.09 <sup>aa</sup>   |

At wk 6, animals were fasted for eight h, weighed, and FBG, TG, and T-CHO values were measured from a blood sample from tail tip. Each of the four parameters was significantly higher in HFD group than in Chow diet (NC) group. Differences between means were analyzed by unpaired two-tailed Student's t-test. <sup>aa</sup> p< 0.01.

**Supplemental Table S3.** Primer sequences for qRT-PCR.

| Target                                            | Reference sequence number | Primers (5'—3')                                       | Product length |
|---------------------------------------------------|---------------------------|-------------------------------------------------------|----------------|
| $\beta$ -actin                                    | NM_031144.3               | F: TCCTAGCACCATGAAGATCAAG<br>R: GACTCATCGTACTCCTGCTTG | 132 bp         |
| Liver fructose-1,6-bisphosphatase (FBPase)        | NM_012558.3               | F: CTATGCTACCTGTGTCCTTGTG<br>R: AGGCAGTCGATGTTGGATG   | 123 bp         |
| Glucose-6-phosphatase, catalytic subunit (G6Pase) | NM_013098.2               | F: AATGAACGTGCTCCACGACT<br>R: CTGCCACCCAGAGGAGATTG    | 185 bp         |
| Glucokinase (GCK)                                 | NM_012565.2               | F: CTTACCTTCTCCTTCCCTG<br>R: ATCTCAAAGTCCCCTCTCCT     | 150 bp         |
| Solute carrier family 2 member 2 (GLUT2)          | NM_012879.2               | F: CACATCCTACTTGGCCTATCTG<br>R: TCAGTGCCCCTTAGTCTTTTC | 146 bp         |
| Acyl-CoA oxidase 1 (ACOX1)                        | NM_017340.2               | F: CTGCCACATATGACCCCAAGA<br>R: GCATGTAACCCGTAGCACTCT  | 154 bp         |
| Carnitine palmitoyltransferase 1A (CPT1A)         | NM_031559.2               | F: GATGGCAGAGGCTCACCAAG<br>R: TGATGCCATTCTTGAACCGGA   | 152 bp         |
| 3-hydroxy-3-methylglutaryl-CoA reductase (HMGCR)  | NM_013134.2               | F: CTTGGTGGCCTCCATTGAGAT<br>R: AGTGTCACCGTCCCACAAT    | 130 bp         |
| Low-density lipoprotein receptor (LDLR)           | NM_175762.2               | F: ACATTTCCGGGTCTGTGATCC<br>R: CGTCTTGCCACATGAATCTTC  | 139 bp         |

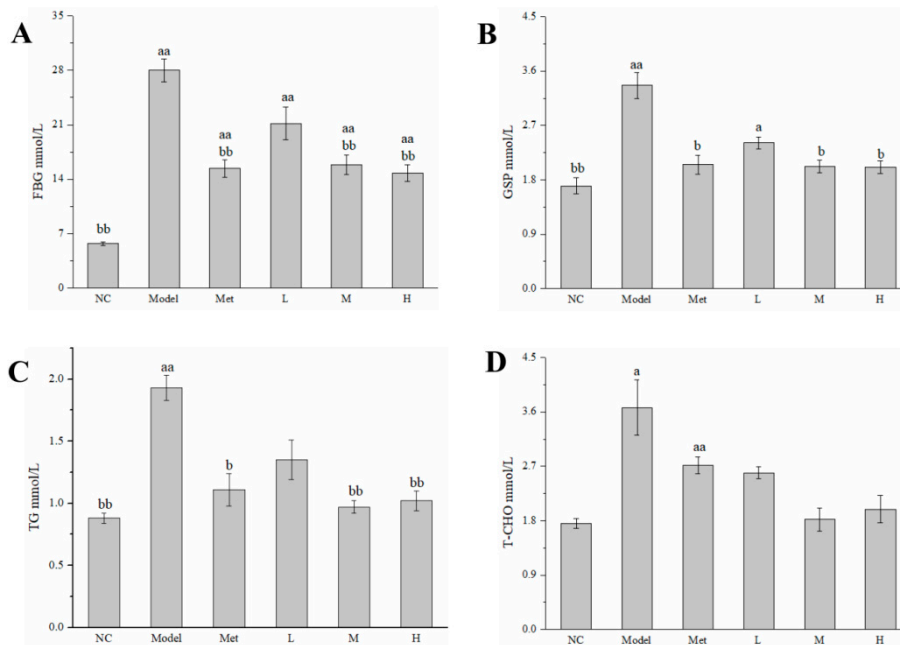

**Figure.1** PLE and metformin treatments reduced FBP(A), GSP(B), TG(C) and T-CHO(D) level

Data are expressed as mean  $\pm$  SEM (n=7 for each group). <sup>aa</sup>p< 0.01, <sup>a</sup>p< 0.05 for Model, Met, L, and H vs. NC. <sup>bb</sup>p< 0.01, <sup>b</sup>p< 0.05 for NC, Met, L, and H vs. Model.
